# Supplementary material for: Metabolomics studies on cachexia in patients with cancer: a scoping review protocol
Source: HighWire-hosted journal article supplement (doi:10.1136/bmjopen-2021-052125), 2022-04-01
Supplement: bmjopen-2021-052125supp001_data_supplement.pdf [file bmjopen-2021-052125supp001_data_supplement.pdf]

**Table S1 The Search Strategy of MEDLINE**

| # | Search Strings                                                                                                                                        |
|---|-------------------------------------------------------------------------------------------------------------------------------------------------------|
| 1 | (cancer* or tumor* or tumour* or neoplas* or malignan* or carcinoma*).ab.                                                                             |
| 2 | (Cachexia or Cachectic or Emaciation or Weight or Weights or Muscle or Muscles or Malnutrition or Undernutrition or Malnourishment or Nutrition*).ab. |
| 3 | (Metabolomics or Metabolomic or Metabonomics or Metabonomic or Lipidomics or Lipidomic or Lipidome or Lipidomes).ab.                                  |
| 4 | #1 and #2 and #3                                                                                                                                      |

**Table S2 The Search Strategy of CNKI**

| # | Search Strings                     |
|---|------------------------------------|
| 1 | (摘要=肿瘤 + 癌)                        |
| 2 | (摘要=恶病质 + 恶液质 + 消瘦 + 体重 + 肌肉 + 营养) |
| 3 | (摘要=代谢组学 + 脂质组学)                   |
| 4 | #1 and #2 and #3                   |

**Table S3 The key information of included studies**

---

| No. | Author | Year of publication | Cachexia definition | Country/Origin | Study design | Setting | Population and sample size | Biological specimens | Independent variables | Independent variables' measure | Statistical analysis |
|-----|--------|---------------------|---------------------|----------------|--------------|---------|----------------------------|----------------------|-----------------------|--------------------------------|----------------------|
|-----|--------|---------------------|---------------------|----------------|--------------|---------|----------------------------|----------------------|-----------------------|--------------------------------|----------------------|

---

**Table S4 The significantly differential metabolites in plasma of cancer cachexia patients**

| No. | Name of metabolites (n=) | Cachectic<br>VS<br>Non-Cachectic | Cachectic<br>VS<br>Pre-Cachectic | Cachectic<br>VS<br>Healthy control | Pre-Cachectic<br>VS<br>Non-Cachectic | Pre-Cachectic<br>VS<br>Healthy control | Non-Cachectic<br>VS<br>Healthy control | References |
|-----|--------------------------|----------------------------------|----------------------------------|------------------------------------|--------------------------------------|----------------------------------------|----------------------------------------|------------|
|-----|--------------------------|----------------------------------|----------------------------------|------------------------------------|--------------------------------------|----------------------------------------|----------------------------------------|------------|

Green: Changed; Red: Increased; Blue: Decreased; Tawny: Not reported.

**Table S5 The significantly differential metabolites in serum of cancer cachexia patients**

| No. | Name of metabolites (n=) | Cachectic<br>VS<br>Non-Cachectic | Cachectic<br>VS<br>Pre-Cachectic | Cachectic<br>VS<br>Healthy control | Pre-Cachectic<br>VS<br>Non-Cachectic | Pre-Cachectic<br>VS<br>Healthy control | Non-Cachectic<br>VS<br>Healthy control | References |
|-----|--------------------------|----------------------------------|----------------------------------|------------------------------------|--------------------------------------|----------------------------------------|----------------------------------------|------------|
|-----|--------------------------|----------------------------------|----------------------------------|------------------------------------|--------------------------------------|----------------------------------------|----------------------------------------|------------|

Green: Changed; Red: Increased; Blue: Decreased; Tawny: Not reported.

**Table S6 The significantly differential metabolites in urine of cancer cachexia patients**

| No. | Name of metabolites (n=) | Cachectic<br>VS<br>Non-Cachectic | Cachectic<br>VS<br>Pre-Cachectic | Cachectic<br>VS<br>Healthy control | Pre-Cachectic<br>VS<br>Non-Cachectic | Pre-Cachectic<br>VS<br>Healthy control | Non-Cachectic<br>VS<br>Healthy control | References |
|-----|--------------------------|----------------------------------|----------------------------------|------------------------------------|--------------------------------------|----------------------------------------|----------------------------------------|------------|
|-----|--------------------------|----------------------------------|----------------------------------|------------------------------------|--------------------------------------|----------------------------------------|----------------------------------------|------------|

Green: Changed; Red: Increased; Blue: Decreased; Tawny: Not reported.

**Table S7 The related metabolic pathways of cancer cachexia patients**

| No. | Name of related metabolic pathways (n=) | References |
|-----|-----------------------------------------|------------|
|     |                                         |            |
